# Supplementary material for: Adherence to integrated management of childhood illness (IMCI) guidelines by community health workers in Kano State, Nigeria through use of a clinical decision support (CDS) platform
Source: PubMed Central journal article supplement (PMC11337650; doi:10.1186/s12913-024-11245-z), 2024-08-20
Supplement: 12913_2024_11245_MOESM1_ESM.pdf [file 12913_2024_11245_MOESM1_ESM.pdf]

**INTEGRATED MANAGEMENT FOR CHILDHOOD ILLNESS OBSERVATION CHECKLIST**

|                                 |                |
|---------------------------------|----------------|
| <b>Local Government Area:</b>   | <b>CHW ID:</b> |
| <b>Name of Health Facility:</b> | <b>Date:</b>   |
| <b>Observer ID:</b>             | <b>Time:</b>   |

| <b>Data Point</b>                                                           |                          |
|-----------------------------------------------------------------------------|--------------------------|
| The CHW asked for the age of the patient                                    | <input type="checkbox"/> |
| The CHW weighed the patient                                                 | <input type="checkbox"/> |
| The CHW took patient's temperature                                          | <input type="checkbox"/> |
| The CHW asked for the patient's history of convulsion                       | <input type="checkbox"/> |
| The CHW asked if the child had a cough                                      | <input type="checkbox"/> |
| The CHW asked if patient had a runny nose                                   | <input type="checkbox"/> |
| The CHW asked if the patient has been vomiting                              | <input type="checkbox"/> |
| The CHW asked if the patient was feeding normally                           | <input type="checkbox"/> |
| The CHW asked if the patient was stooling more than usual                   | <input type="checkbox"/> |
| The CHW asked about blood in stool                                          | <input type="checkbox"/> |
| The CHW examined the neck by tilting the head forward                       | <input type="checkbox"/> |
| The CHW asked the patient to open his/her mouth and looked inside           | <input type="checkbox"/> |
| The CHW examined patient's chest with a stethoscope                         | <input type="checkbox"/> |
| The CHW counted the patient's breath per minute by using a watch/cell phone | <input type="checkbox"/> |

|                                                                                                   |                          |
|---------------------------------------------------------------------------------------------------|--------------------------|
| The CHW pinched the skin of the belly and watched it return to normal shape                       | <input type="checkbox"/> |
| The CHW examined patient's skin for rashes by exposing the skin on the arms, legs, chest and back | <input type="checkbox"/> |
| The CHW pushed on the top of both feet and checked if it went inwards making an indentation       | <input type="checkbox"/> |
| The CHW wrapped a MUAC strip around the patient's upper arm                                       | <input type="checkbox"/> |
| The CHW pulled down the lower eyelids to examine eyes                                             | <input type="checkbox"/> |
| The CHW looked into the ear and felt for tender swellings behind the ears.                        | <input type="checkbox"/> |

## Overall Assessment

CHW ID:
